# Supplementary material for: Reconstructions and predictions of the global carbon budget with an emission-driven Earth System Model
Source: Copernicus journal article supplement (doi:10.5194/esd-2022-37), 2022-08-01
Supplement: Supplementary file [file esd-2022-37-AC2-supplement.zip]

# Illustration of decadal prediction system based on an Earth system model

## A Uninitialized simulations

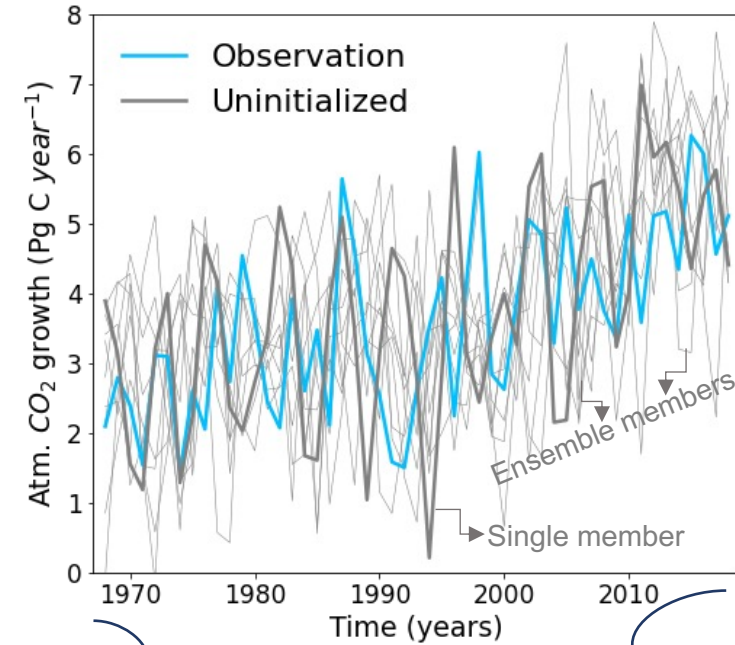

**Uninitialized** “free” simulations capture long-term trends, but not the year-to-year variations.

Observational and reanalysis data products are assimilated.

## B Assimilation reconstruction

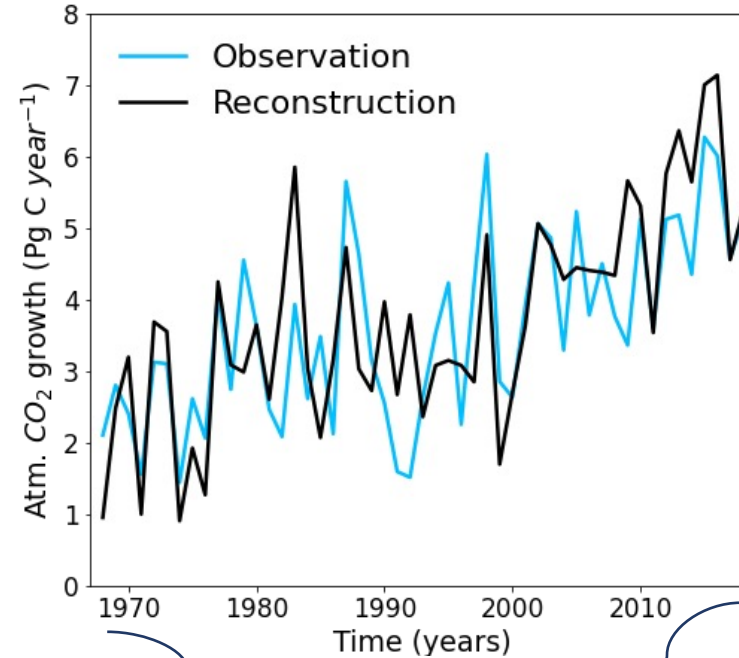

**Reconstruction by assimilation** captures observed year-to-year variations to a large extent.

Predictions are initialized from reconstruction yearly and run freely for several years.

## C Initialized predictions

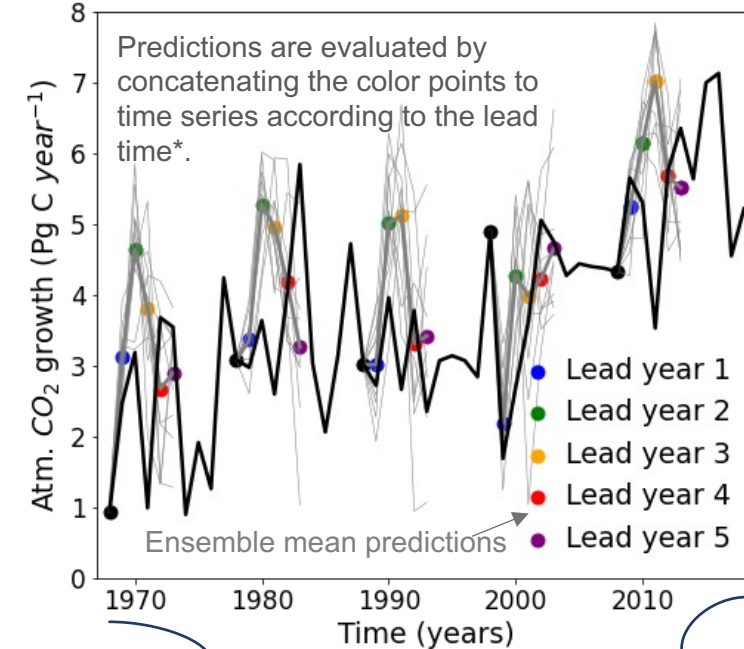

**Initialized predictions** follow the evolution of reconstruction, bias due to initialization needs to be corrected.

\*Note that not every starting year predictions are shown.
